# Supplementary material
Source: PubMed Central journal article supplement (PMC3098631)

Supplementary Figure: ELISpots of all measured patients

a:

Patient #1, Cohort A

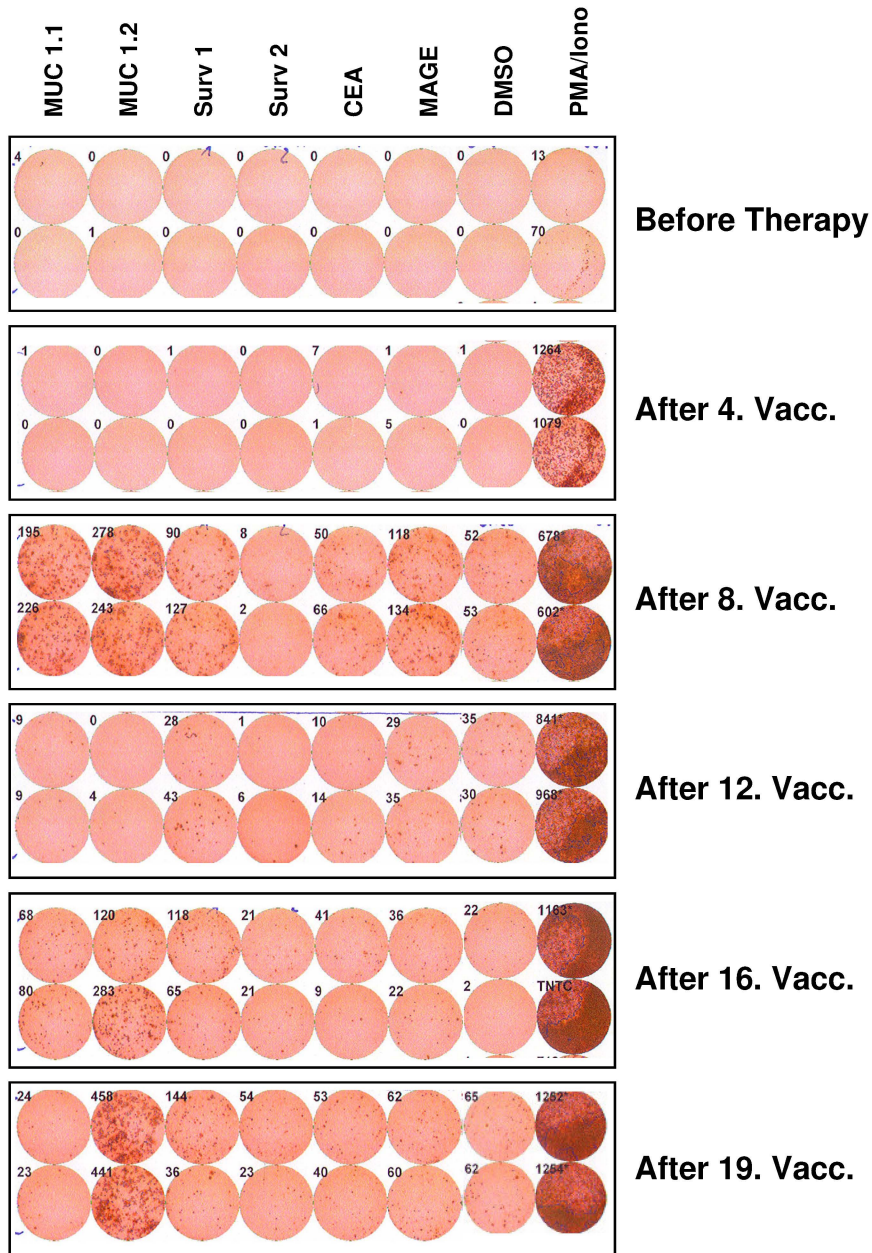

Patient #2, Cohort B

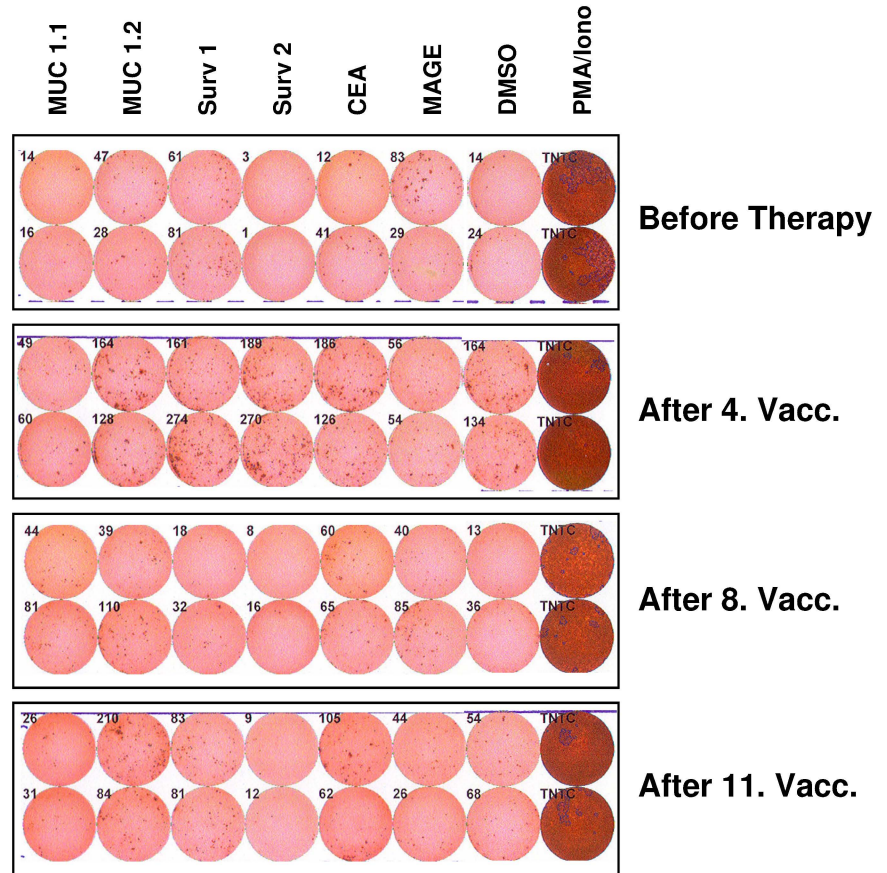

**b: CD4+ responses**

**Patient #6, Cohort A**

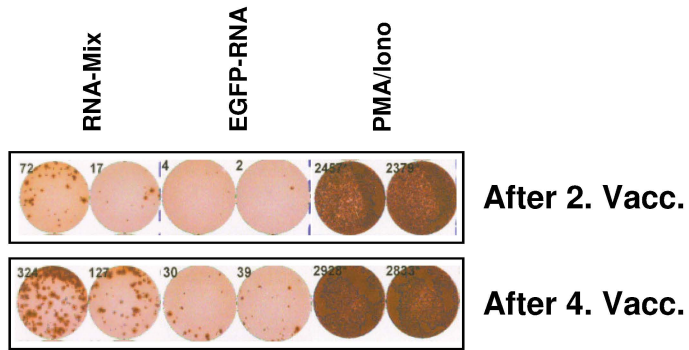

**Patient #14, Cohort A**

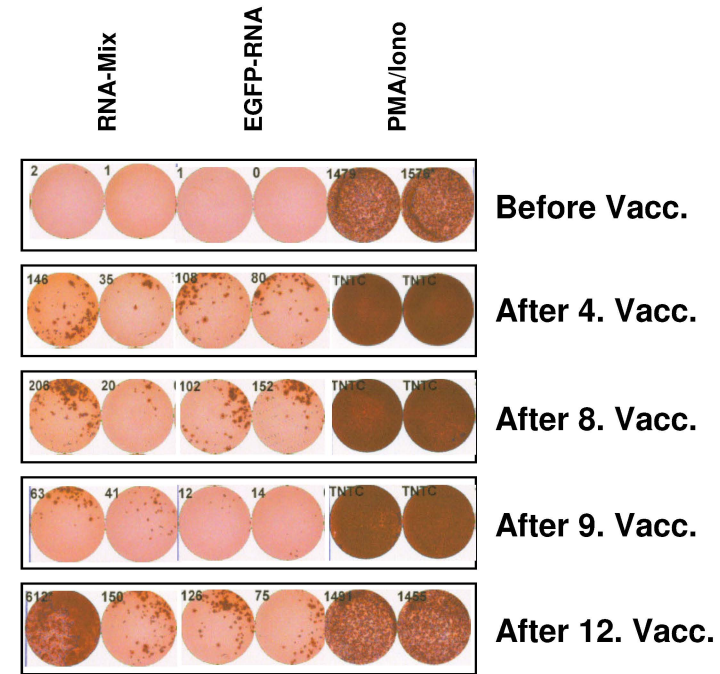

**Patient #1, Cohort B**

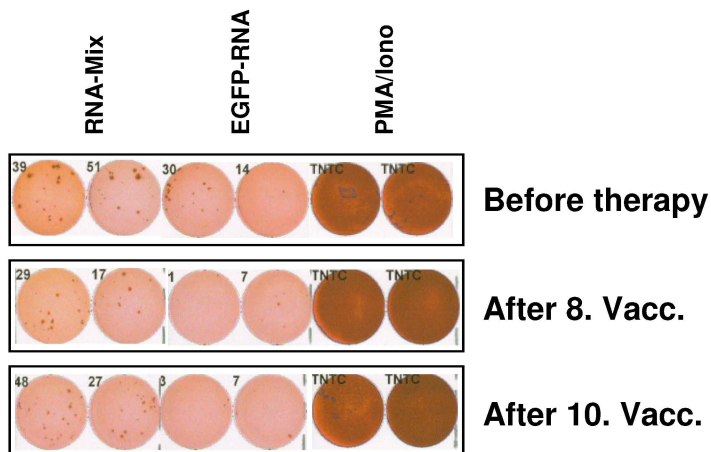

**Patient #10, Cohort B**

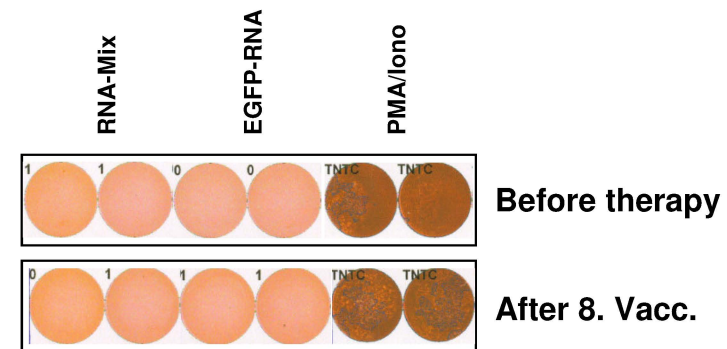



### Patient #15, Cohort B

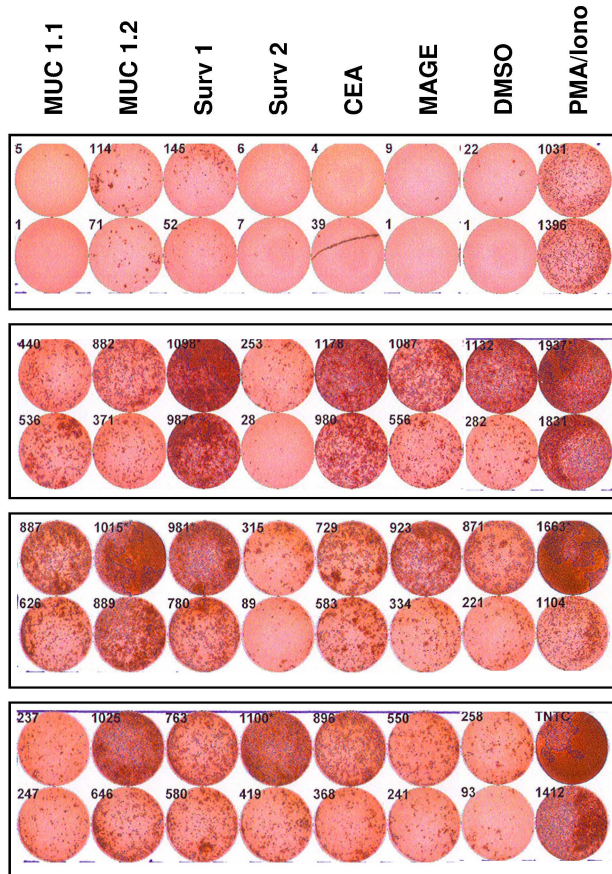

Before Therapy

After 4. Vacc.

After 8. Vacc.

After 12. Vacc.

### Patient #16, Cohort B

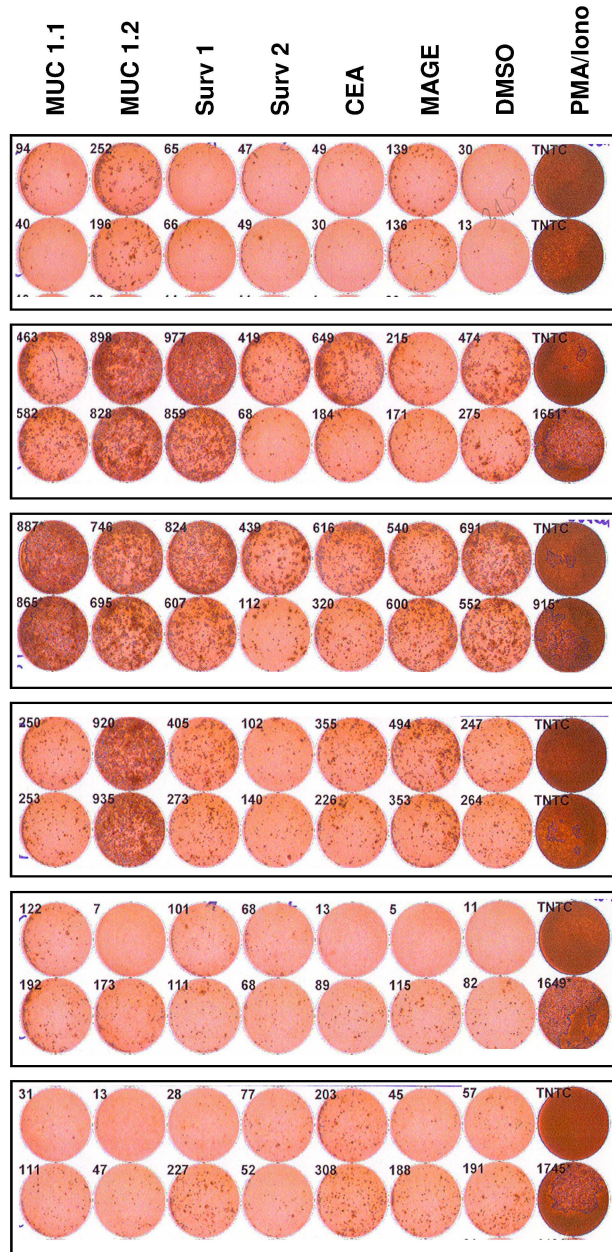

Before Therapy

After 4. Vacc.

After 5. Vacc.

After 9. Vacc.

After 18. Vacc.

After 21. Vacc.



### Patient #11, Cohort B

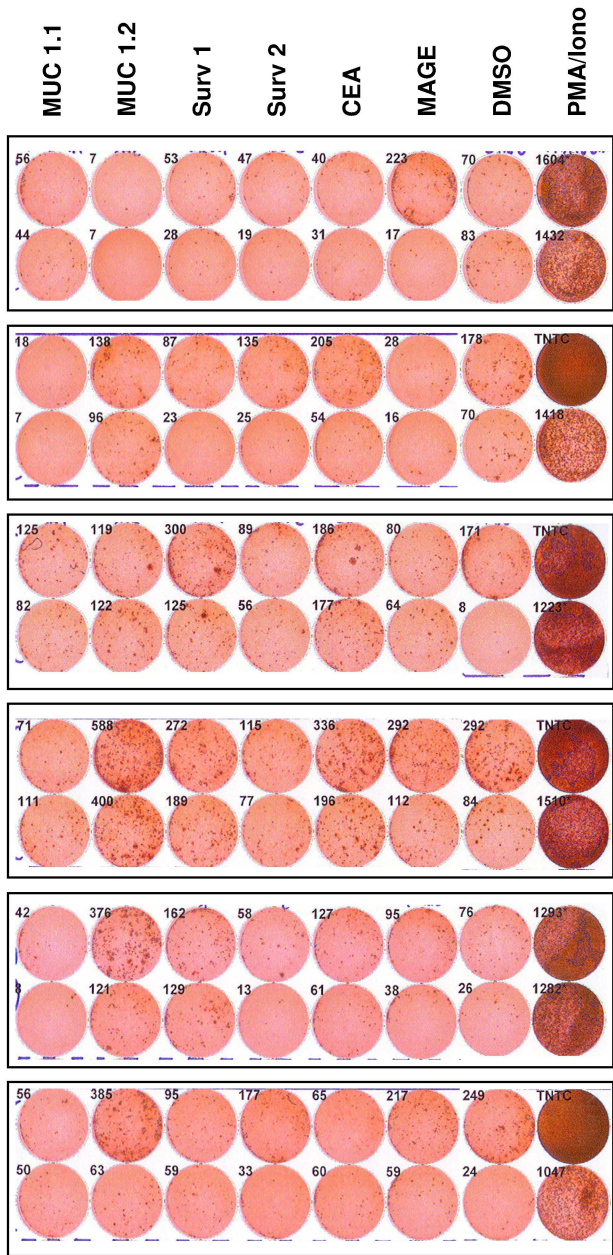

Before Therapy

After 4. Vacc.

After 8. Vacc.

After 9. Vacc.

After 11. Vacc.

After 14. Vacc.

### Patient #11, Cohort B

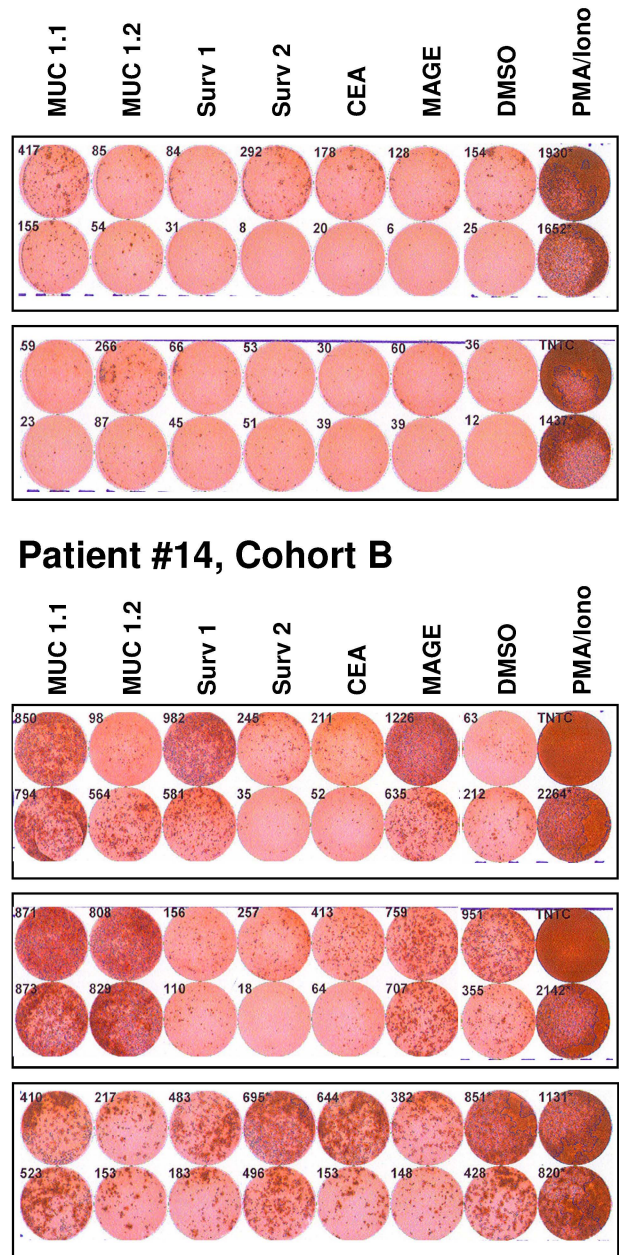

After 17. Vacc.

After 20. Vacc.

### Patient #14, Cohort B

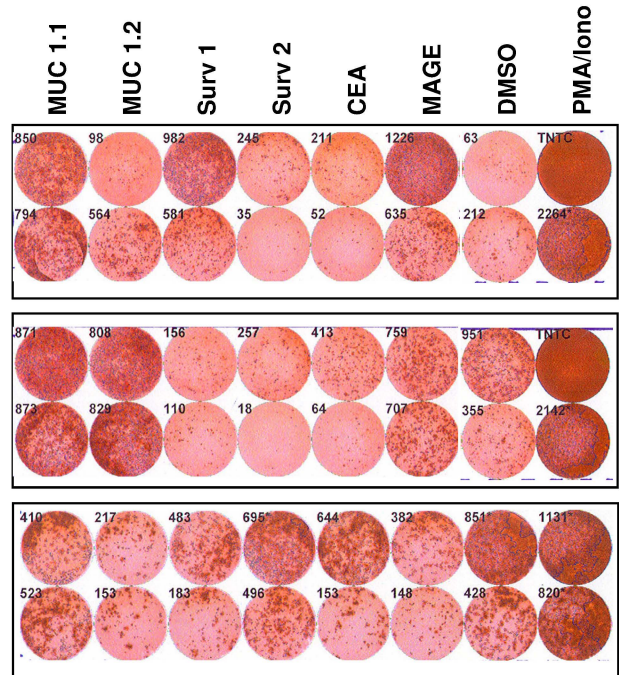

Before Therapy

After 4. Vacc.

After 8. Vacc.



### Patient #6, Cohort B

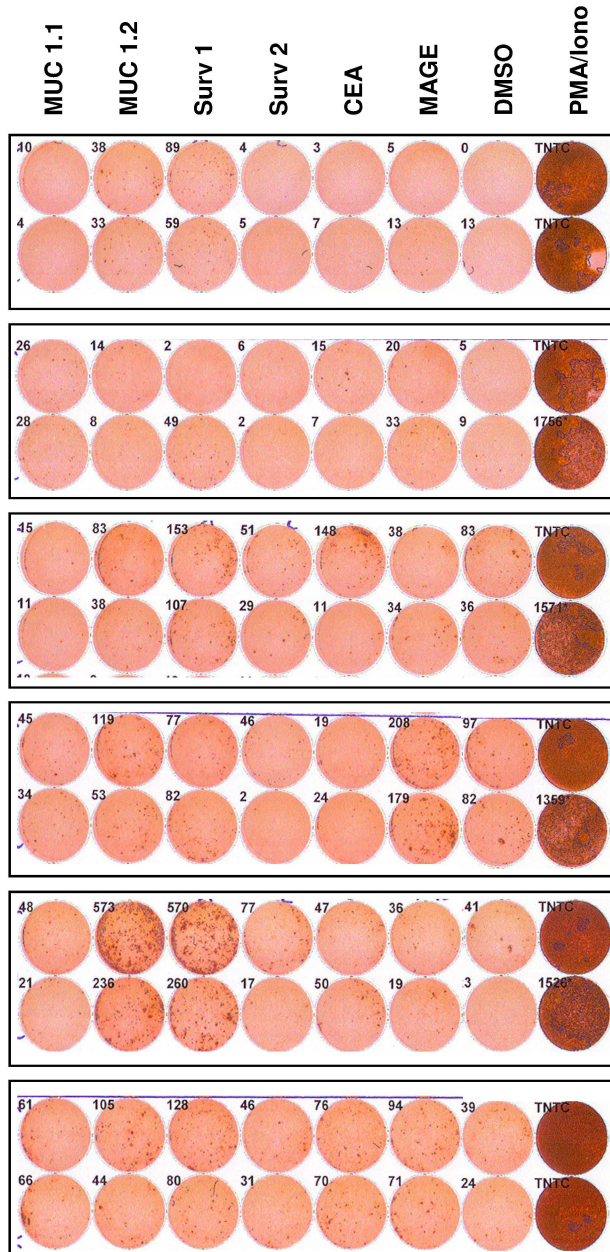

Before Therapy

After 4. Vacc.

After 8. Vacc.

After 9. Vacc.

After 12. Vacc.

After 14. Vacc.

### Patient #8, Cohort B

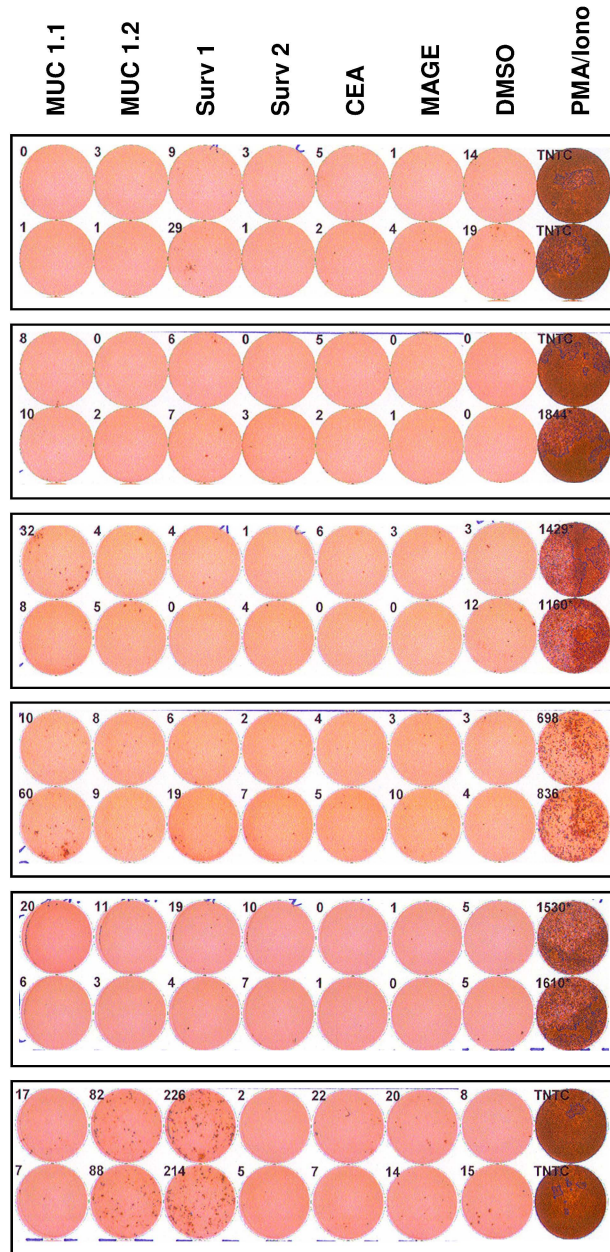

Before Therapy

After 4. Vacc.

After 8. Vacc.

After 9. Vacc.

After 12. Vacc.

After 16. Vacc.

**Patient #3, Cohort B**

MUC 1.1 MUC 1.2 Surv 1 Surv 2 CEA MAGE DMSO PMA/Iono

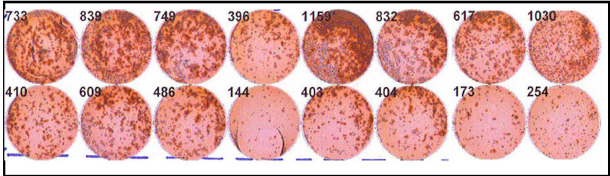

**Before Therapy**

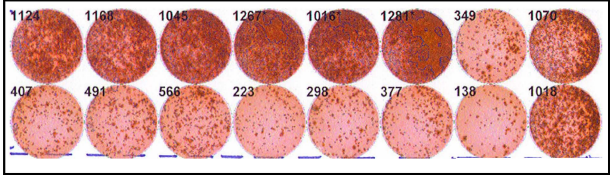

**After 4. Vacc.**

**Patient #5, Cohort B**

MUC 1.1 MUC 1.2 Surv 1 Surv 2 CEA MAGE DMSO PMA/Iono

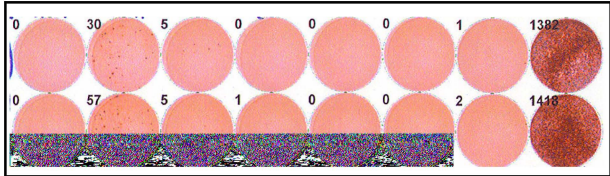

**Before Therapy**

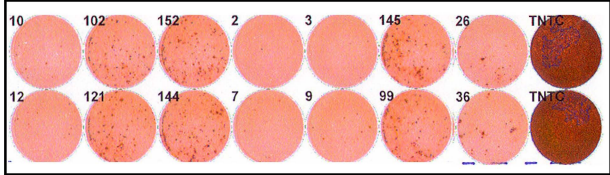

**After 4. Vacc.**

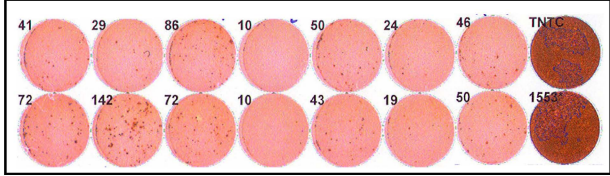

**After 8. Vacc.**

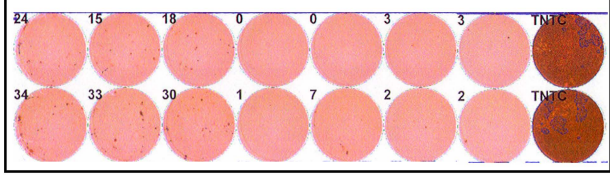

**After 13. Vacc.**



### Patient #4, Cohort B

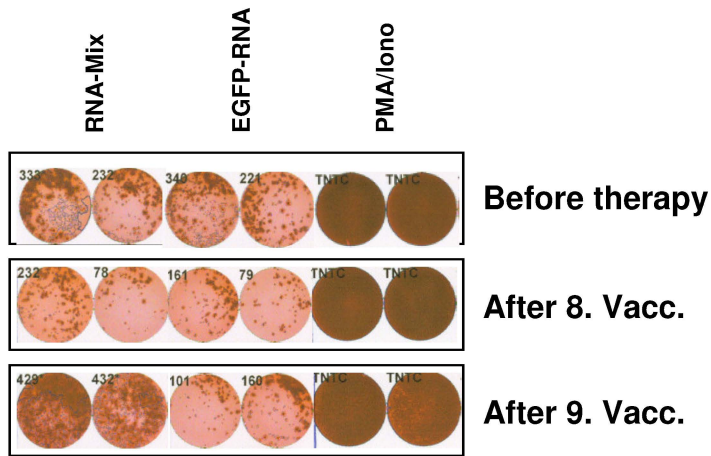

### Patient #12, Cohort B

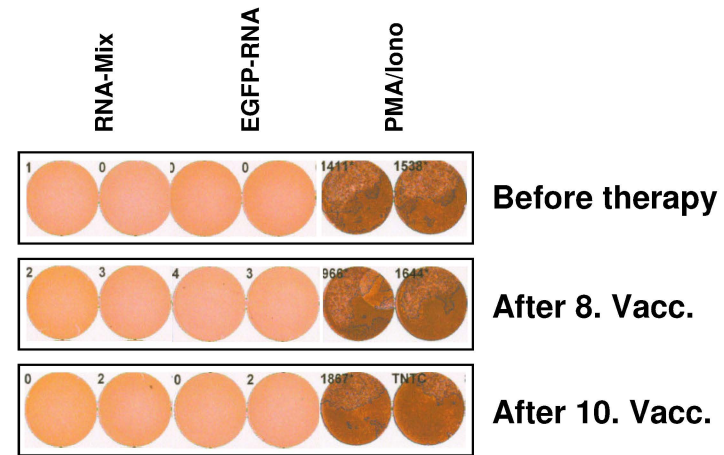

### Patient #7, Cohort B

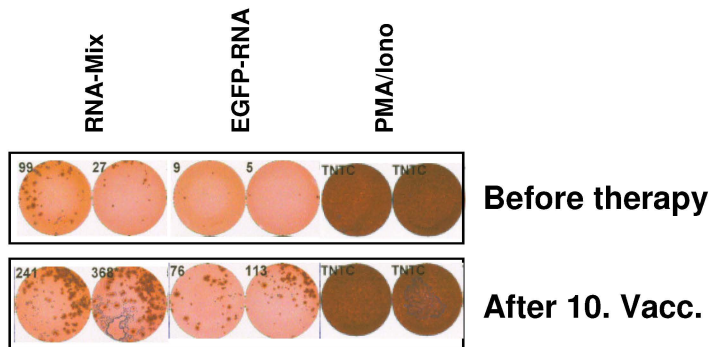

### Patient #13, Cohort B

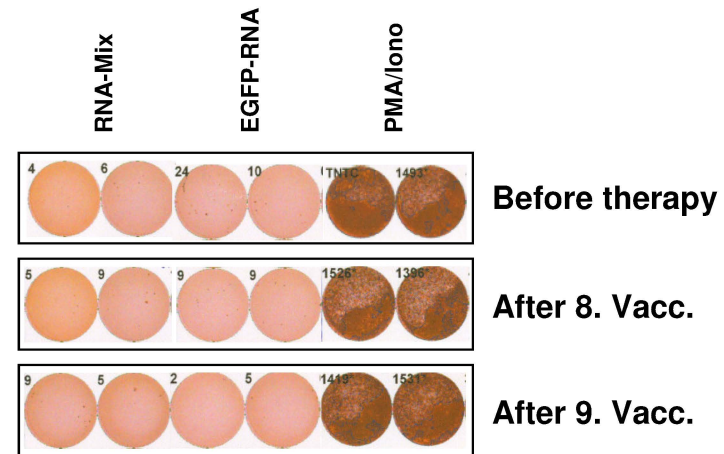

Supplement: mt2010289x2.pdf [file mt2010289x2.pdf]
