# Supplementary material
Source: PubMed Central journal article supplement (PMC3098631)

# Supplementary Figure

a:

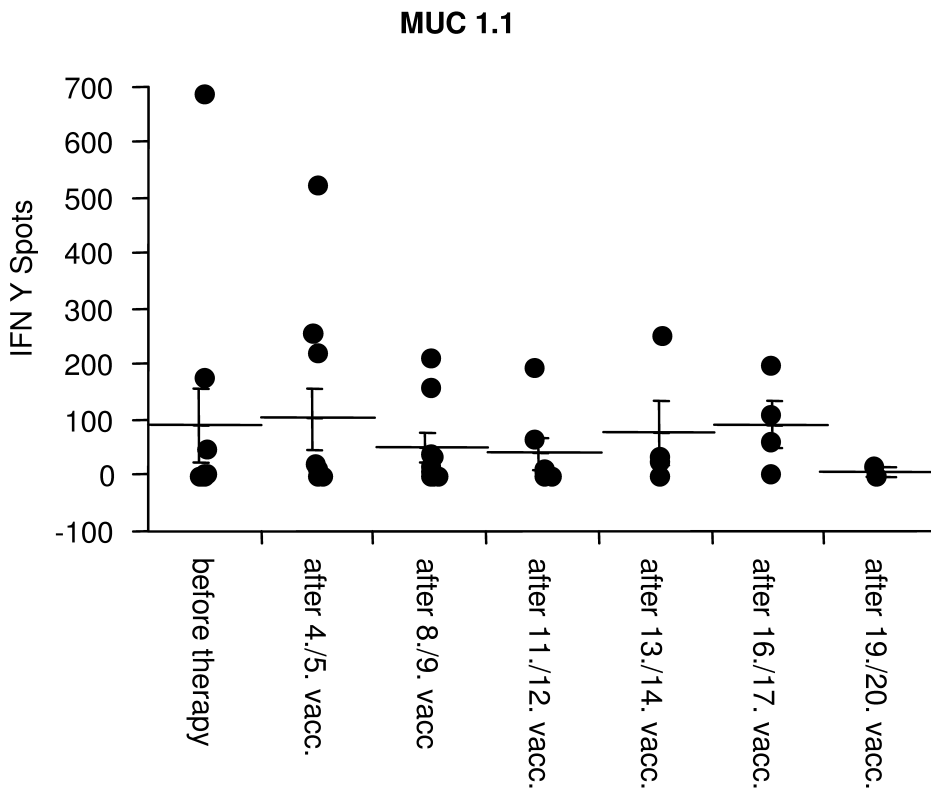

b:

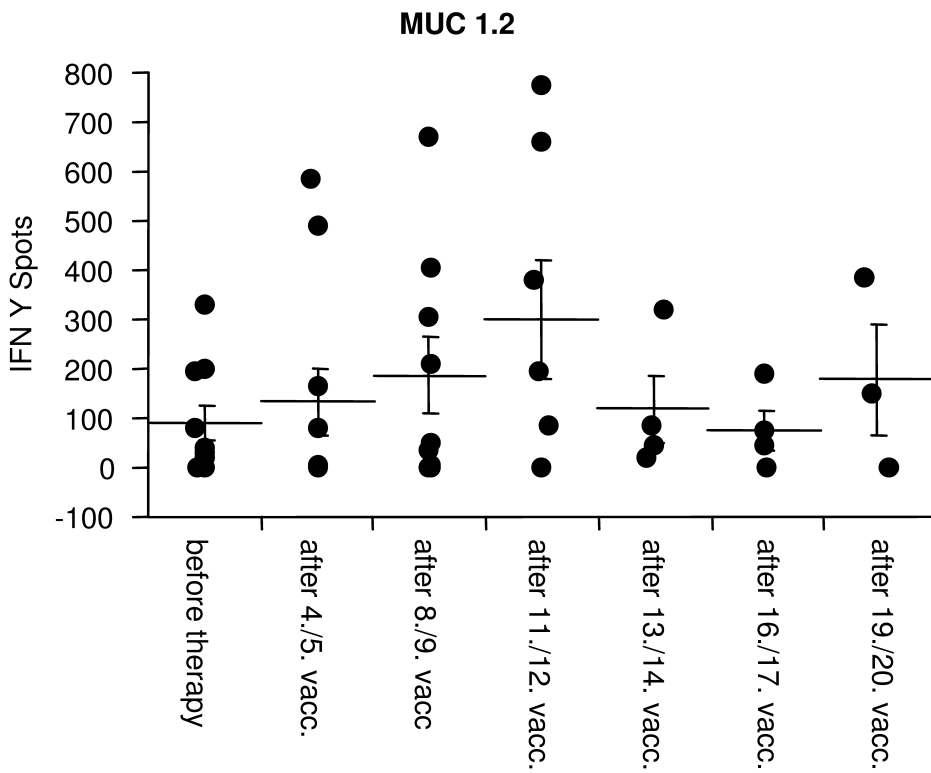

c:

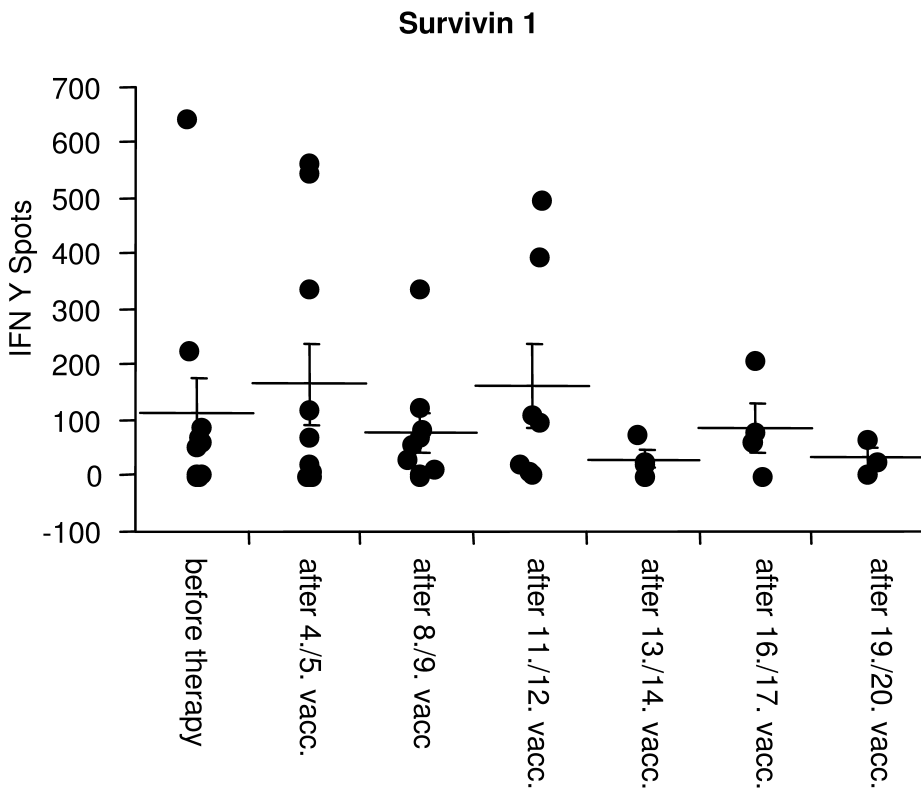

d:

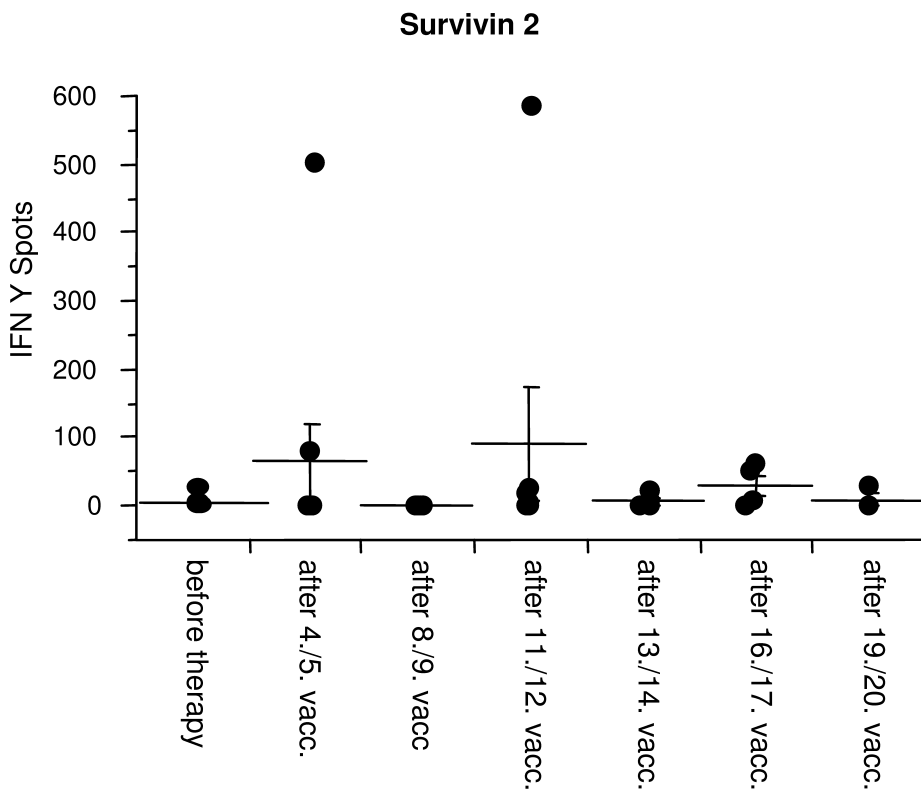

e:

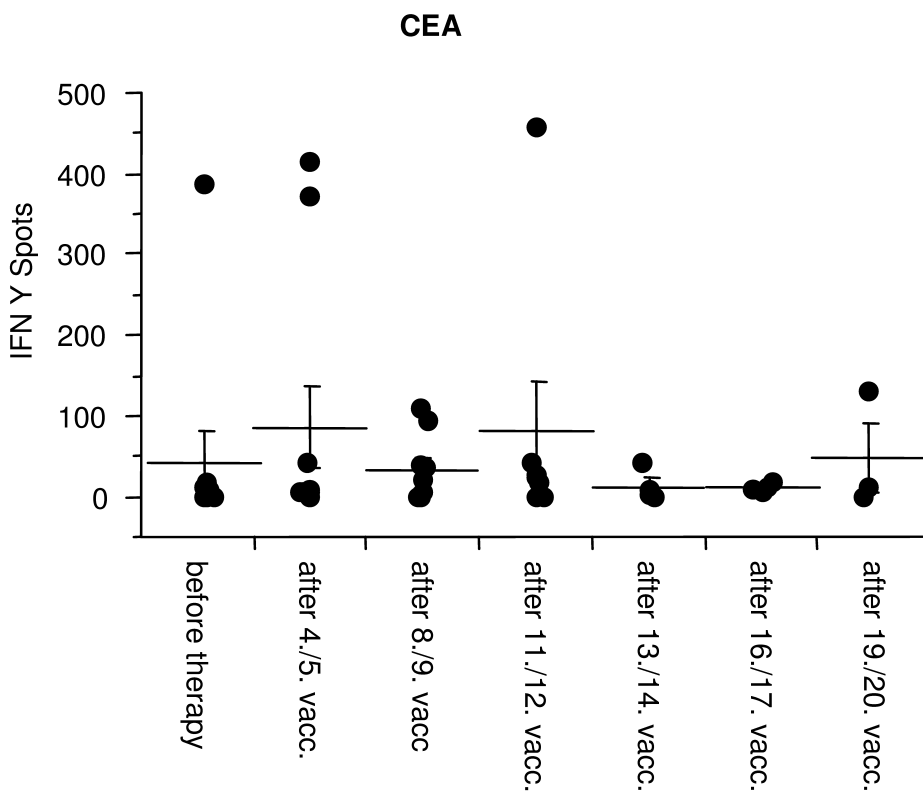

f:

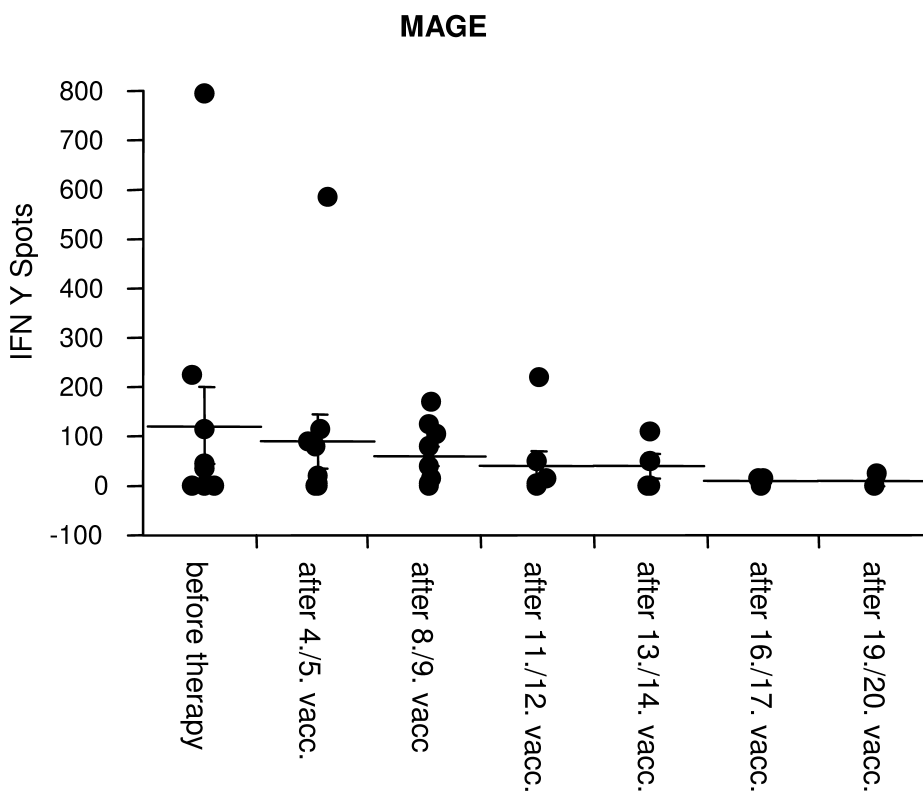

g:

### RNA-MIX

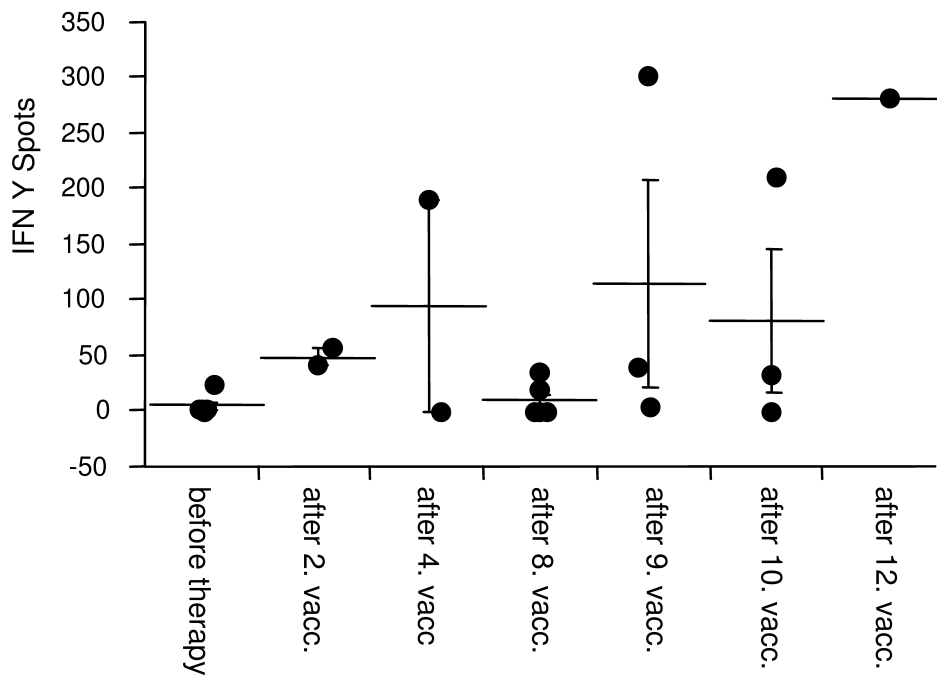

Supplement: mt2010289x1.pdf [file mt2010289x1.pdf]
